# Supplementary material
Source: PubMed Central journal article supplement (PMC3781963)
Supplement: a6415b616592d1deba0ebe33572d3358_genetics.113.155382-1.pdf [file a6415b616592d1deba0ebe33572d3358_genetics.113.155382-1.pdf]

# General Strategy for Genome Editing Across Nematode Species

## Hermaphrodite Species

## Male/Female Species

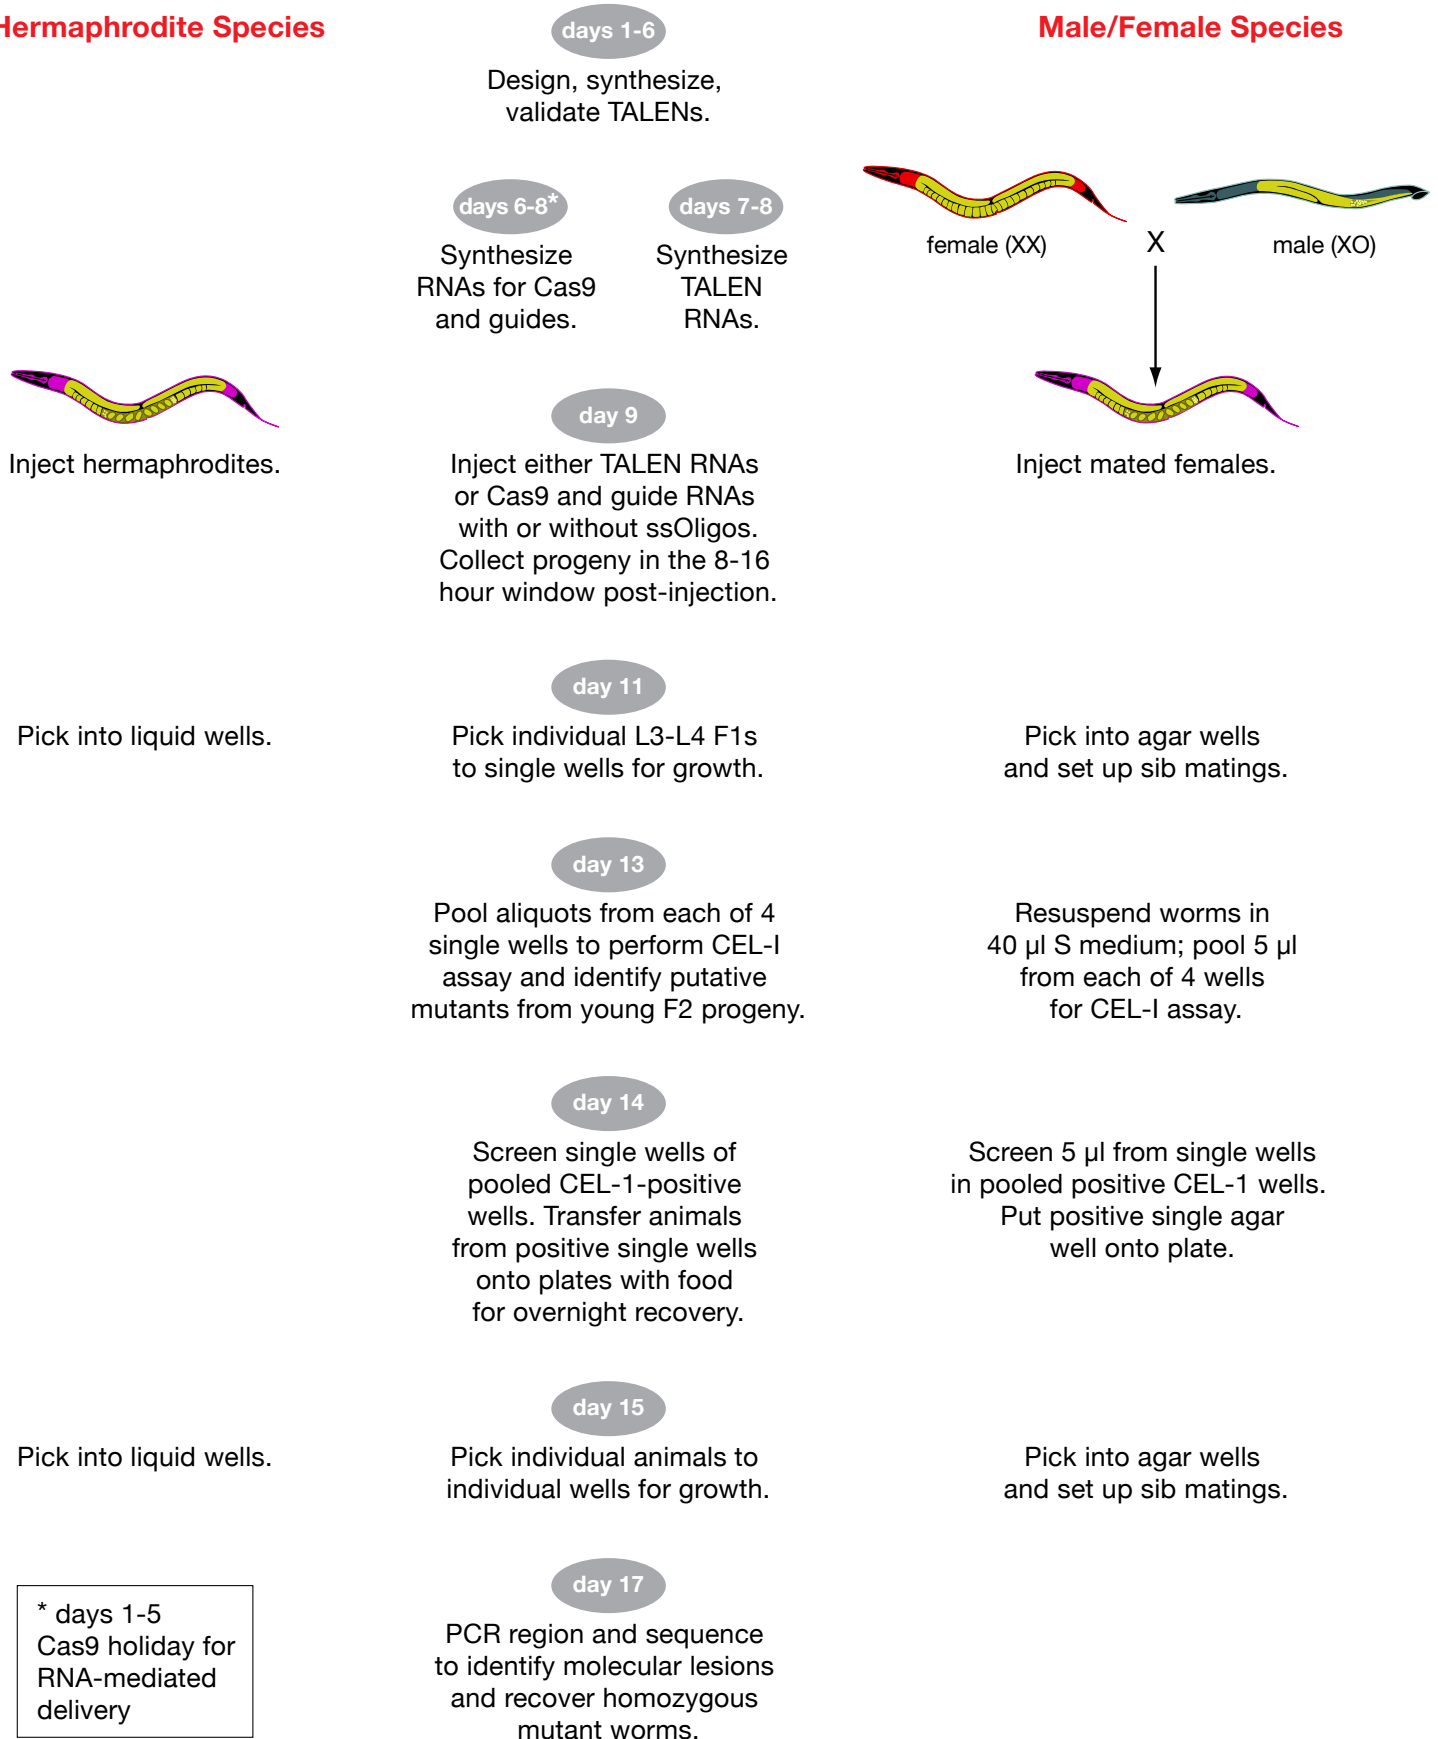

\* days 1-5  
Cas9 holiday for RNA-mediated delivery

**Figure S1** General strategy for genome editing across species. The daily work flow for a complete experiment to delete or insert DNA sequences using TALENs or CRISPR-Cas9 is provided for both hermaphroditic species and male/female species. The center column details the steps common to all species. The right and left columns provide specific details relevant to either hermaphroditic species (left) or male/female species (right).

step 1

pFUS\_A Reaction

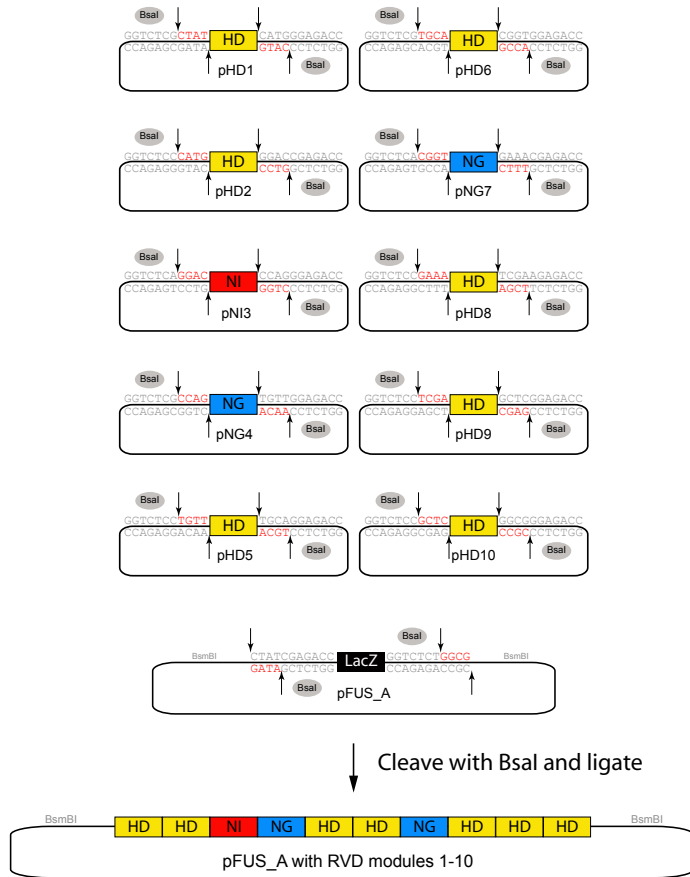

pFUS\_B Reaction

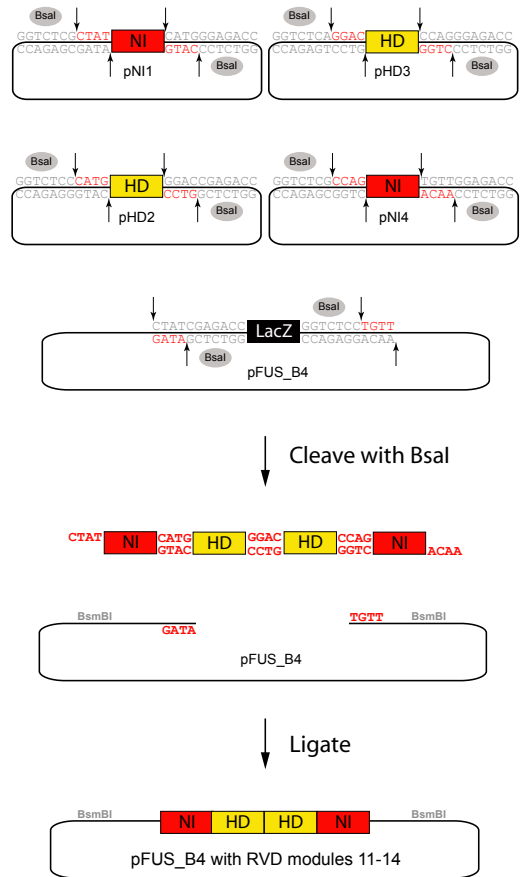

step 2

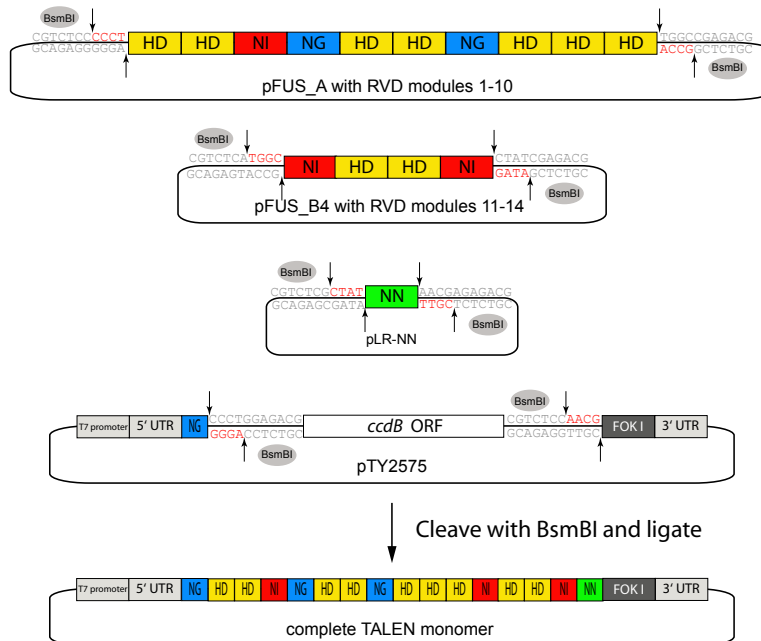

**Figure S2** Diagram for the construction of a TALEN. TALENs were constructed using the Golden Gate TALEN Kit. See <http://www.addgene.org/TALEfactor/goldengate/voytas/>. This kit includes numerous RVD-encoding plasmids that permit the efficient assembly of RVD domains in the desired order for DNA recognition. The assembly principle is based on the ability of Type IIS restriction enzymes to cleave outside of their recognition sequence, specifically to one side. The nucleotides between the recognition site and the cleavage site of each RVD has a unique end once cleaved from its plasmid so that the cleaved RVD can only ligate with an RVD having a complementary sequence. Thus, RVDs can assemble in only one order. The kit is organized to permit 10 RVDs to be assembled in one reaction (A reaction) and the next 10 RVDs to be assembled in a second reaction (B reaction) (see step 1). The products of the two reactions are then assembled into the final TALEN (step 2). A more extended explanation for the RVD assembly in the first reaction is the following: For each RVD position in the final assembly, plasmids are provided for all possible RVDs so that after BsaI digestion, any RVD for that position will have the same overhanging sequences. Using the first position as an example, the desired RVD can be retrieved from any one of the plasmids pHD-1, pNN-1, pNG-1 pNI-1, and either pNK-1 or pNH-1. After digestion with BsaI each RVD will have overhangs of 5' CTAT 3' at one end and 3' GTAC 5' at the other end (red bases). Similarly, for the second position, plasmids are provided for all possible RVDs such that after BsaI digestion, all RVDs have a 3' GTAC 5' overhang that uniquely complements the 5' CATG 3' overhang of the first-position RVD.

Step 1. The plasmids for the first 10 RVDs (Reaction A) are mixed with the plasmid pFUS\_A, T4DNA ligase, and the Type IIS restriction enzyme BsaI. The mixture is treated to 10 cycles of 37°C for BsaI digestion and 16°C for ligation. The plasmids for RVDs 11 - 14 and pFUS\_B4 are treated in the same manner. Ligated DNAs from the two reactions are transformed independently into DH5 $\alpha$  chemically competent cells and plated on LB agar with spectinomycin, IPTG, and X-gal. For each transformation, white colonies are selected and checked by colony PCR or by restriction digestion of isolated plasmid DNA with ApaI and BamHI. Plasmids can be sequenced to insure that they have the correct RVDs.

Step 2. The two plasmids with the correct RVDs from step 1 are mixed with a plasmid containing the last RVD (pLR-NN in this example), and our customized *C. elegans* vector (pTY2575) that contains a T7 promoter, a 5' UTR, the initial RVD NG, a ccdB gene for selection, a FokI nuclease monomer, and 3' UTR. The type IIS restriction enzyme BsmBI and T4 ligase are added to this mix and treated to 10 cycles of 37°C and 16°C as above. The resulting ligation is transformed into DH5 $\alpha$  cells and plated on LB agar with Ampicillin. The ccdB ORF targets DNA gyrase and kills bacteria that receive a plasmid containing this DNA. In a correctly assembled TALEN clone, the ccdB ORF will have been replaced by TALEN sequences, permitting the bacteria to live. Resulting colonies are screened by colony PCR or by digestion with diagnostic restriction enzymes and sequenced to confirm that the RVDs are correct.

**rex-32 5' FRT**

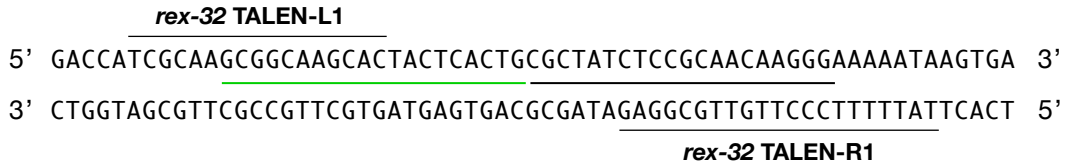

**5' FRT oligo/final mutant**

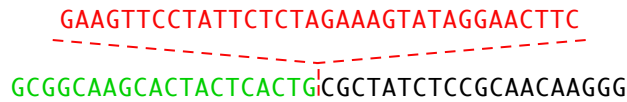

**rex-32 3' FRT**

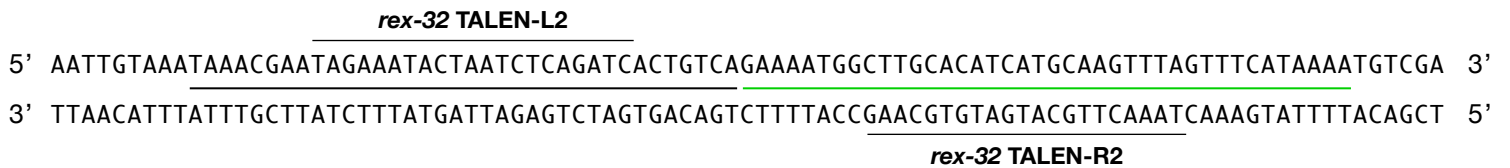

**3' FRT oligo/final mutant**

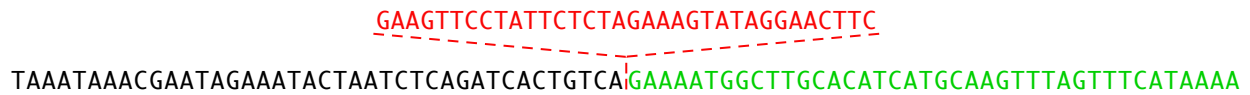

**Figure S3** Strategy for inserting FRT sites that flank *rex-32*. Two segments of *rex-32* and the TALE recognition sequences within *rex-32* (black lines) used to target TALEN-induced DSBs for HDR-mediated FRT insertion at the 5' and 3' ends using the ssOligos represented below each DNA segment. The homology arms (green and black) for the 5' FRT insertion were 20 bp, while those for the 3' FRT insertion in the strain carrying the 5' FRT site were 40 bp to direct the ssOligo to the appropriate sequences at the 3' end rather than the 5' FRT sequence.

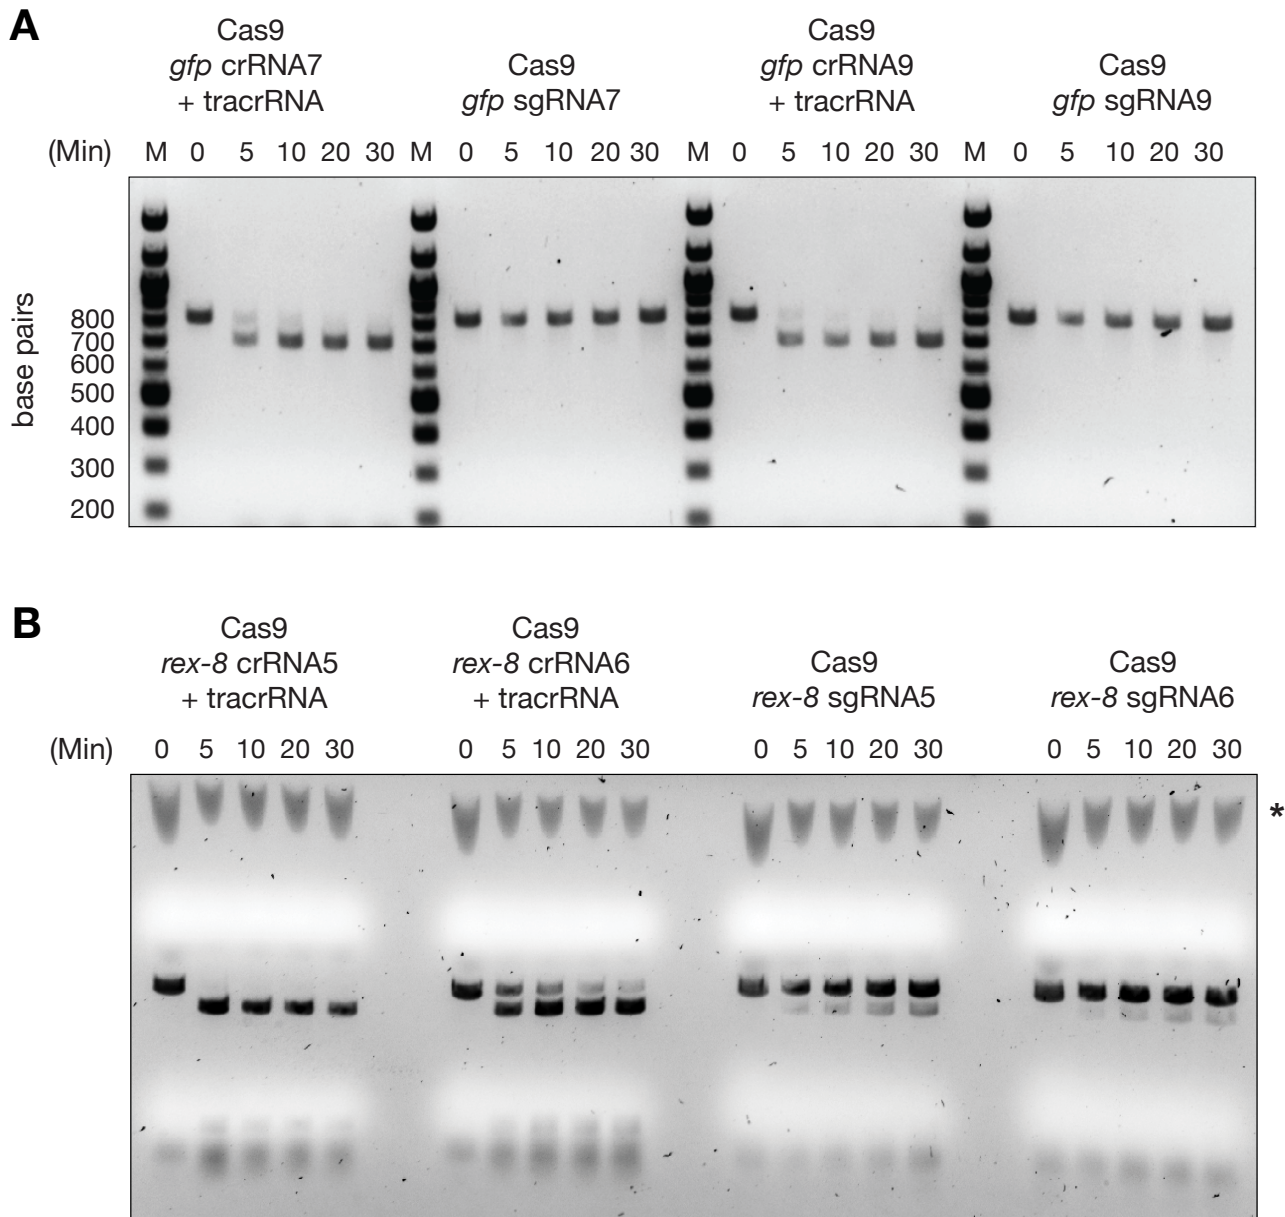

**Figure S4** *in vitro* DNA cleavage assays comparing the effectiveness of Cas9-crRNA: tracrRNA and Cas9-sgRNA complexes. Double-stranded DNA cleavage was tested in time course reactions using the molar ratio of Cas9 : guide RNA : target DNA as 0.5  $\mu$ M : 1  $\mu$ M : 0.5  $\mu$ M. Reactions were conducted at 37°C. The *in vitro* assays show that the dual RNA guides are more effective at promoting DNA cleavage than the sgRNAs.

(A) DNA cleavage assays for *gfp*. The target binding sequences in the *gfp* RNA guides are the following: crRNA7, 5' AAAGGGCAGAUUGUGUGGAC 3' and crRNA9, 5' GUGGACAGGUAAUGGUUGUC 3'. M, 100-bp markers.

(B) DNA cleavage assays for *rex-8*. The target binding sequences in the *rex-8* RNA guides are the following: crRNA5, 5' GGUGGAUAAAAUAAUUGAGC 3' and crRNA6, 5' UGGAUAAAAUAAUUGAGCGG 3'. The asterisk shows the location of Cas9-bound DNA in the gel.

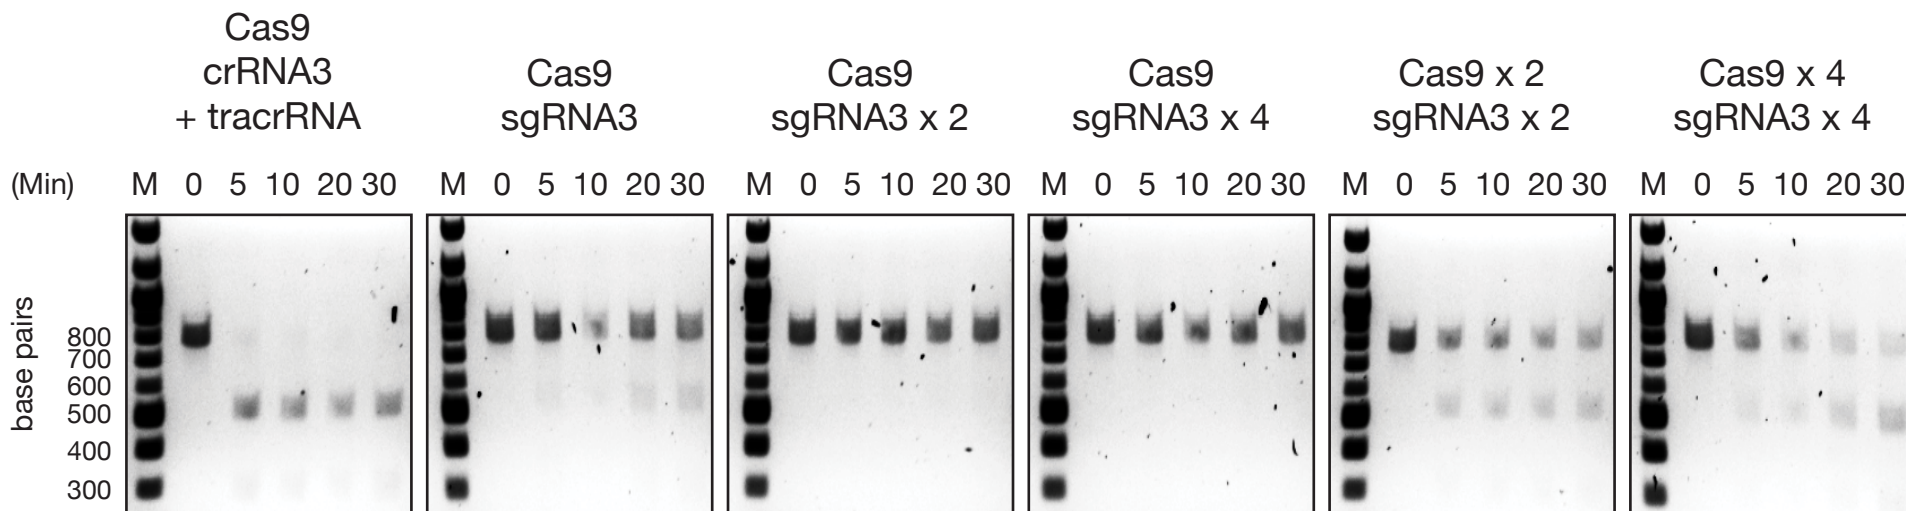

**Figure S5** Effect of Cas9 protein and sgRNA concentration on DNA cleavage efficiency *in vitro*. Double-stranded DNA cleavage was tested in timecourse reactions using 250 nM DNA and various concentrations of Cas9 and guide RNAs. Starting (1x) concentration of Cas9 and sgRNA or tracrRNA:sgRNA was 250 nM; x 2 concentration = 500 nM; x 4 concentration = 1  $\mu$ M. M, 100-bp markers.
